# Supplementary material
Source: MDPI journal article supplement (https://www.mdpi.com/2379-139X/10/1/1)
Supplement: s1 [file s1]

**Supplementary Table S1.** Endoleak classification.

|                                                           |                                              |                                                                                             |
|-----------------------------------------------------------|----------------------------------------------|---------------------------------------------------------------------------------------------|
| <i>Type 1 Endoleak (EL1)</i>                              | 5-10%                                        | <b>EL1a:</b> leakage from proximal attachment site of the graft[37]                         |
|                                                           |                                              | <b>EL1b:</b> leakage from distal attachment site of the graft                               |
|                                                           |                                              | <b>EL1c:</b> leakage from back filling due to an incomplete common iliac arterial occlusion |
| <i>Type 2 Endoleak (EL2)</i>                              | 10-40%                                       | Backflow of collateral arteries into the aneurysm sac[38]                                   |
| <i>Type 3 Endoleak (EL3)</i>                              | 2-4%                                         | Stent graft component separation or EL due to a fabric tear[39]                             |
| <i>Type 4 Endoleak (EL4)</i>                              | Almost never seen with new generation grafts | Leakage due to porosity of the graft[46]                                                    |
| <i>Type 5 Endoleak (EL5), also known as “endotension”</i> | Diagnosis of exclusion                       | Expansion of the sac without an apparent EL on imaging[46]                                  |

**Supplementary Table S2.** Sensitivity and Specificity of EL detection comparison

| Study                                                                        | Sensitivity                                                      | Specificity                                                      |
|------------------------------------------------------------------------------|------------------------------------------------------------------|------------------------------------------------------------------|
| <b>Turrión Gomollón</b> et al.<br><i>Investigative Radiology</i><br>2023[10] | Reader 1: TNC 0.95 vs VNI 0.95<br>Reader 2: TNC 0.88 vs VNI 0.88 | Reader 1: TNC 0.84 vs VNI 0.86<br>Reader 2: TNC 0.98 vs VNI 0.94 |

**Abbreviations:** TNC = True Non-contrast; VNI = Virtual Non-iodine;
